# Supplementary material for: Bone histology and growth curve of the earliest ceratopsian Yinlong downsi from the Upper Jurassic of Junggar Basin, Northwest China
Source: PeerJ. 2024 Dec 19;12:e18761. doi: 10.7717/peerj.18761 (PMC11663408; doi:10.7717/peerj.18761)
Supplement: Supplemental Information 2 [file peerj-12-18761-s002.xlsx]

## Sheet: Sheet1
	Yinlong downsi	Psittacosaurus mongoliensis	P. lujiatunensis	P.sibiricus	Protoceratops	Koreaceratops	Triceratops horridus	Utahceratops	Kosmoceratops	Avaceratops lammersi	Yehuecauhceratops mudei	Einiosaurus procurvicornis	Centrosaurus	Pachyrihnosaurus	Cerasinops
References	this study	Erickson & Tumanova 2000	Zhao et al. 2019	Skutschas et al. 2021	Fostowicz-Frelik & Słowiak 2018	Baag & Lee 2022	de Rooij et al. 2024	Levitt 2013	Levitt 2013	Hedrick et al 2020	Hedrick et al 2020	Reizner 2010	Levitt 2013	Erickson and Druckenmiller, 2011; Hedrick et al 2020	Chinnery and Horner 2007
Specimen number	IVPP V18677; IVPP V33266; IVPP V18678; IVPP V18636; IVPP V33267; IVPP V18679; IVPP V18682; IVPP V18683; IVPP V33268; IVPP V18637	PIN 1369/1–11/1948; PIN 698/1977; PIN 698/15/1977; PIN 1369/1–11/1948; PIN 698/5–3/1946; PIN 698/4–22/1946; PIN 698/7–4/1946; PIN 698/2–2/1977–15; PIN 698/1946; PIN 698/5–9/2/1946	IVPP V16902; ELDM V1037; ELDM V1038; IVPP V14341; IVPP V14748; IVPP V18344; IVPP V18343; IVPP V12617	PM TSU 120-Sh3-125; PM TSU 16/0-56; PM TSU 16/0-55; PM TSU 16/0-54; KOKМ 4652/16;KOKМ 4652/11; KOKМ 4652/1;KOKМ 4652/9-10; KOKМ 4652/13	ZPAL MgD-II/3a–d; ZPAL MgD-II/8; ZPAL MgD-II/11a–c;ZPAL MgD-II/15; ZPAL MgD-II/16a, b; ZPAL MgD-II/33; ZPAL MgD-II/35a–c; ZPAL MgD-II/407; ZPAL MgD-II/408	KIGAM VP 200801)	RGM.1394097-RGM.1394120	UMNH VP 20444; UMNH VP 20454; UMNH VP 12198; UMNH VP 16800	UMNH VP 17000; UMNH VP 21339	ANS 15800 (juvenile)	CPC 274	MOR 456 – T1-MOR 456 – T16	TMP 79.11.56; TMP 66.10.36; TMP T-4	UAMES 3551	MOR300
Bone elements	tibia, fibula, rib	humerus, femur, tibia	humerus, ulna, radius, femur, tibia, fibula	fragmentary femora	parietal frill, rib, humerus, femur, ulna, fibula, tibia,	tibia and fibula (proximal end)	rib, dorsal and cervical vertebrae, humerus, radius, ulna, femur, tibia, fibula	humerus, ulna, femur , tibia, rib, tendon, limb shaft	femur	rib, humerus	femur	tibia	tibia	femur	humerus, radius femur and tibia
Dominated bone tissue type	fibrolamellar bone	fibrolamellar bone	fibrolamellar bone	fibrolamellar bone	fibrolamellar bone	fibrolamellar bone	fibrolamellar bone	fibrolamellar bone	fibrolamellar bone	fibrolamellar bone	Laminar fibrolamellar bone	fibrolamellar bone	fibrolamellar bone	fibrolamellar bone	fibrolamellar bone
Parallel fibered bone	shown in early growth stage	absent in the largest individual	shown in outer cortex of subadult	shown in outer cortex of subadult	shown in all growth stage; much scarcer in femur than in tibia and humerus	possibly present in section bones	shown in early growth stage	unknown	unknown	unknown	unknown	unknown	unknown	absent	unknown
Thickened and highly organized parallel-fibered bone in the outer cortex	appeared in subadult stage	absent	appeared in subadult stage	appeared in adult stage	appeared in subadult stage	unknown	appeared in late subadult (hos 5)	unknown	unknown	unknown	unknown	unknown	unknown	absent	absent
Erosion cavity in inner cortex	shown in early growth stage	shown in an eight-year-old specimen	appear in juvenile stage (3 years old), abundant in subadult stage	shown in juvenile stage (after 3 years old)	shown in juvenile stage (tibia)	present	shown in early subadult	unknown	unknown	unknown	present in subadult	appeared after 1 year old	present	unknown	present
Sharpey's fibers	absent or rare, in the outer cortex of the tibia (late juvenile stage)	unknown	shown in the tibia closed to the fibula (juvenile)	unknown	present in the frill and limb bones	absent	present in ribs and one radius	unknown	unknown	absent	absent	unknown	unknown	unknown	unknown
Secondary osteons	appeared in late juvenile	unknown	appeared in subadult stage	appeared in subadult stage	appeared in juvenile stage	absent in the tibia	abundant throughout the cortex in adult	abundant throughout the cortex in adult	abundant throughout the cortex in adult	present	present, densely packed in inner part	a few secondary osteons in subadult (2-3 LAGs)	present	present	present
Secondary remodeling (dense HB)	appeared in subadult stage	unknown in sampled sections	appeared in adult stage	appeared in subadult stage	appeared in subadult stage	unknown	appeared in early stage (HOS 3), and dominent the cortex in adult	abundant throughout the cortex in adult(UMNH VP 12198)	abundant throughout the cortex in adult	absent	present	shown in late subadult stage (4 and more LAGs), and dominate the bone tissue of the adult individual	present, and do not dominate the bone tissue of the adult individual	present in the deep cortex	absent
Endosteal bone	appeared in late juvenile	unknown	shown in juvenile and completed in adult stage	absent (possibly due to remodeling of the primary cortex)	shown in a rib of a subadult stage	unknown	unknown	unknown	unknown	unknown	unknown	unknown	unknown	unknown	absent
Vascular canal shape	prodominent longitudinal and reticular	reticular vascular canals prodominent in all stages,	predominent longitudinal and reticular in earlier ontogenetic stages, and longitudinal canals in adult stage; radial vascular canals were present in the forelimbs at a younger age.	reticular canals abundant in hatchling stage, predominent longitudinal and reticular in earlier ontogenetic stages,, and longitudinal canals in adult stage	longitudinal vascular canals predominent in all growth stage; Reticular vascular canals shown in subadult stage of a tibia, no radial vascular canals reported.	longitudinal and circumferential vascular canals predominent in the tibia, reticular and radial vascular canals shown in the outer cortex of the fibula	a mix of longitudinal and circumferential vascular canals in earlier ontogenetic stages; reticular vascular canals are present; radial vascular canals appeared in late subadult stage.	predominent longitudinal vascular canals, reticular and radial vascular canals are also present	predominent longitudinal vascular canals, reticular and radial vascular canals are also present.	radial and reticular canals in its inner cortex and then transitioned to circumferentially oriented canals in its outer cortex.	longitudinal, no radiual and reticular canals	reticular and longitudinal osteons in early juvenile (<1 LAG), reticular vascular canals are predomnent in subadult; radial vascular canals appeared after one year old	alternate between cycles of longitudinal and radial orientation	reticular	longitudinal (humerus), circumferentially oriented vascular canals (tibia)
Dense radial vascular canals	present in one fibula of a subadult stage.	dence radial vascular canals present in the outer cortex of the largest indivudal	absent	absent	absent	absent	absent	absent	absent	absent	absent	absent	absent	absent	absent
LAGs	appeared in juvenile stage	appeared in juvenile stage	appeared in juvenile stage	appeared in juvenile stage	only present in an adult fibula	absent in the tibia and present the outermost part of the right fibula	appearing late in ontogeny	absent	absent	present	present	present	present	present	present
LAG erosion	after four years old (late juvenile)	before six years old (juvenile)	juvenile	juvenile	NA		NA	NA	NA	unknown	present	after 2-3 years old	unknown		unknown
Sexual maturity	6 years old	9 years old	9 years old	unknown	unknown	unknown	unknown			unknown	unknown	3-5 years old	unknown	nine years old	absent
EFS	absent	absent	absent	absent	absent	absent	possibly present	absent	absent	absent	absent	absent	absent	absent	absent
